# Supplementary material for: No Association between Vitamin D and Weight Gain: A Prospective, Population-Based Study
Source: MDPI journal article supplement (doi:10.3390/nu14153185), 2022-08-03
Supplement: s1 [file s1]

## Supplementary information

**Supplementary table S1:** comparison of the characteristics at baseline (2003-2006) between excluded and included participants for each follow-up, CoLaus|PsyCoLaus study, Lausanne.

|                         | 5-year<br>Included | Excluded    | P-value | 10-year<br>Included | Excluded    | P-value |
|-------------------------|--------------------|-------------|---------|---------------------|-------------|---------|
| Sample size             | <b>3638</b>        | <b>3095</b> |         | <b>2999</b>         | <b>3720</b> |         |
| Age (years)             | 51.6 ± 10.4        | 53.8 ± 11.0 | <0.001  | 50.8 ± 10.3         | 54.1 ± 10.8 | <0.001  |
| Women (%)               | 1724 (47.4)        | 1820 (58.8) | <0.001  | 1373 (45.8)         | 2171 (58.1) | <0.001  |
| Born in Switzerland (%) | 2290 (63.0)        | 1741 (56.3) | <0.001  | 1880 (62.7)         | 2151 (57.6) | <0.001  |
| Education (%)           |                    |             | <0.001  |                     |             | <0.001  |
| University              | 777 (21.4)         | 543 (17.6)  |         | 651 (21.7)          | 669 (18.0)  |         |
| High school             | 892 (24.5)         | 733 (23.8)  |         | 776 (25.9)          | 849 (22.8)  |         |
| Apprenticeship          | 1314 (36.1)        | 1063 (34.5) |         | 1054 (35.2)         | 1323 (35.6) |         |
| Mandatory               | 655 (18.0)         | 742 (24.1)  |         | 518 (17.3)          | 879 (23.6)  |         |
| Smoking (%)             |                    |             | 0.052   |                     |             | 0.271   |
| Never                   | 1453 (39.9)        | 1279 (41.4) |         | 1207 (40.3)         | 1525 (40.9) |         |
| Former                  | 1227 (33.7)        | 956 (31.0)  |         | 1003 (33.4)         | 1180 (31.7) |         |
| Current                 | 958 (26.3)         | 854 (27.7)  |         | 789 (26.3)          | 1023 (27.4) |         |
| Physically active (%)   | 1964 (54.0)        | 1543 (51.4) | 0.037   | 1594 (53.2)         | 1913 (52.6) | 0.628   |

Results are expressed as average ± standard deviation or as number of participants and (percentage). Between-group comparisons performed using t-test for continuous variables and chi-square for categorical variables.

**Supplementary table S2:** comparison of the characteristics at baseline (2003-2006)-of participants who completed the first and the second follow-ups, according to gender, CoLaus|PsyCoLaus study, Lausanne.

|                           | 5-year<br>Women | Men         | P-value | 10-year<br>Women | Men         | P-value |
|---------------------------|-----------------|-------------|---------|------------------|-------------|---------|
| Sample size               | <b>1724</b>     | <b>1914</b> |         | <b>1373</b>      | <b>1626</b> |         |
| Age (years)               | 51.6 ± 10.5     | 51.6 ± 10.4 | 0.992   | 51.0 ± 10.6      | 50.5 ± 10.1 | 0.206   |
| Born in Switzerland (%)   | 1082 (62.8)     | 1208 (63.1) | 0.826   | 858 (62.5)       | 1022 (62.9) | 0.838   |
| Education (%)             |                 |             | <0.001  |                  |             | <0.001  |
| University                | 297 (17.2)      | 480 (25.1)  |         | 244 (17.8)       | 407 (25.0)  |         |
| High school               | 443 (25.7)      | 449 (23.5)  |         | 373 (27.2)       | 403 (24.8)  |         |
| Apprenticeship            | 612 (35.5)      | 702 (36.7)  |         | 459 (33.4)       | 595 (36.6)  |         |
| Mandatory                 | 372 (21.6)      | 283 (14.8)  |         | 297 (21.6)       | 221 (13.6)  |         |
| Smoking (%)               |                 |             | <0.001  |                  |             | <0.001  |
| Never                     | 802 (46.5)      | 651 (34.0)  |         | 652 (47.5)       | 555 (34.1)  |         |
| Former                    | 479 (27.8)      | 748 (39.1)  |         | 383 (27.9)       | 620 (38.1)  |         |
| Current                   | 443 (25.7)      | 515 (26.9)  |         | 338 (24.6)       | 451 (27.7)  |         |
| Physically active (%)     | 959 (55.6)      | 1005 (52.5) | 0.060   | 741 (54.0)       | 853 (52.5)  | 0.409   |
| BMI (kg/m <sup>2</sup> )  | 24.8 ± 4.7      | 26.3 ± 3.6  | <0.001  | 24.9 ± 4.6       | 26.1 ± 3.6  | <0.001  |
| BMI categories (%)        |                 |             | <0.001  |                  |             | <0.001  |
| Underweight               | 41 (2.4)        | 11 (0.6)    |         | 29 (2.1)         | 9 (0.6)     |         |
| Normal                    | 1005 (58.3)     | 745 (38.9)  |         | 782 (57.0)       | 664 (40.8)  |         |
| Overweight                | 457 (26.5)      | 906 (47.3)  |         | 390 (28.4)       | 742 (45.6)  |         |
| Obese                     | 221 (12.8)      | 252 (13.2)  |         | 172 (12.5)       | 211 (13.0)  |         |
| Waist (cm)                | 82.6 ± 12.1     | 94.7 ± 10.5 | <0.001  | 82.7 ± 11.8      | 94.2 ± 10.5 | <0.001  |
| Abdominal obesity (%)     | 516 (29.9)      | 440 (23.0)  | <0.001  | 418 (30.4)       | 355 (21.8)  | <0.001  |
| Vitamin D levels (nmol/L) | 47.0 ± 21.5     | 46.8 ± 22.0 | 0.817   | 47.8 ± 21.8      | 47.5 ± 22.2 | 0.662   |
| Vitamin D categories (%)  |                 |             | 0.383   |                  |             | 0.387   |
| Normal                    | 179 (10.4)      | 217 (11.3)  |         | 153 (11.1)       | 196 (12.1)  |         |
| Insufficiency             | 541 (31.4)      | 565 (29.5)  |         | 437 (31.8)       | 482 (29.6)  |         |

|            |             |             |          |            |
|------------|-------------|-------------|----------|------------|
| Deficiency | 1004 (58.2) | 1132 (59.1) | 783 (57) | 948 (58.3) |
|------------|-------------|-------------|----------|------------|

---

Results are expressed as average  $\pm$  standard deviation or as number of participants and (percentage). Between-group comparisons performed using t-test for continuous variables and chi-square for categorical variables.
